# Supplementary material for: Source Apportionment of Soil Heavy Metal(Loid)s in Farmland Using Diverse Models: A Comparative Assessment in the Yellow River Delta
Source: MDPI journal article supplement (doi:10.3390/jmse11051069), 2023-05-17
Supplement: s1 [file s1]

Archive with 3 entries (3 files):
- Supplementary Figure.pdf
- Supplementary FIle S1. The statistical yearbook of Dongying City in 2020.pdf
- Supplementary Table.pdf
