# Supplementary material for: Source Apportionment of Soil Heavy Metal(Loid)s in Farmland Using Diverse Models: A Comparative Assessment in the Yellow River Delta
Source: MDPI journal article supplement (doi:10.3390/jmse11051069), 2023-05-17
Supplement: s1 [file s1]

# DONGYING STATISTICAL YEARBOOK

# 2021

Dongying City Bureau of Statistics  
Dongying Investigation Team of National Bureau of Statistics

# **Agriculture**

---

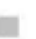

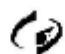

## 9-6 Rural electrification and agricultural chemistry (2020)

Unit: tons/ha./10<sup>4</sup> kWh

| County                    | Application amount of agricultural fertilizer |       |       |       |       |                                 |       |      |      |       |
|---------------------------|-----------------------------------------------|-------|-------|-------|-------|---------------------------------|-------|------|------|-------|
|                           | Total amount of chemical fertilizer           |       |       |       |       | Total amount of pure fertilizer |       |      |      |       |
|                           |                                               | N     | P     | K     | Comp. |                                 | N     | P    | K    | Comp. |
| Dongying city             | 227947                                        | 71402 | 29573 | 12571 | 11440 | 82810                           | 23536 | 8040 | 4890 | 46344 |
| Dongying district         | 21111                                         | 847   | 314   | 123   | 19827 | 8150                            | 363   | 127  | 41   | 7619  |
| Hekou district            | 15177                                         | 6120  | 2034  | 301   | 6722  | 5057                            | 2112  | 561  | 115  | 2269  |
| Kenli district            | 34112                                         | 12468 | 8114  | 1526  | 12004 | 11622                           | 4145  | 1820 | 621  | 5036  |
| Lijin county              | 66836                                         | 23447 | 6371  | 2951  | 34067 | 25360                           | 7384  | 1127 | 1401 | 15448 |
| Guangrao county           | 89631                                         | 28455 | 12687 | 7667  | 40822 | 32184                           | 9525  | 4402 | 2711 | 15546 |
| Dongying development zone | 1080                                          | 65    | 53    | 3     | 959   | 437                             | 7     | 3    | 1    | 426   |

## 9-6 Continued Table

| County                    | Agricultural plastic film usage |                    | Agricultural diesel usage | Pesticide application | Rural electricity consumption |       |
|---------------------------|---------------------------------|--------------------|---------------------------|-----------------------|-------------------------------|-------|
|                           | Mulch film usage                | Film coverage area |                           |                       |                               |       |
| Dongying city             | 2833                            | 1884               | 39936                     | 16482                 | 2346                          | 41879 |
| Dongying district         | 65                              | 44                 | 1092                      | 1196                  | 219                           | 3235  |
| Hekou district            | 140                             | 119                | 2884                      | 1792                  | 192                           | 3318  |
| Kenli district            | 851                             | 841                | 14866                     | 4277                  | 667                           | 4465  |
| Lijin county              | 814                             | 493                | 14684                     | 4322                  | 486                           | 7595  |
| Guangrao county           | 949                             | 379                | 6314                      | 4714                  | 775                           | 23072 |
| Dongying development zone | 14                              | 8                  | 96                        | 181                   | 7                             | 194   |
