# Supplementary material for: Source Apportionment of Soil Heavy Metal(Loid)s in Farmland Using Diverse Models: A Comparative Assessment in the Yellow River Delta
Source: MDPI journal article supplement (doi:10.3390/jmse11051069), 2023-05-17
Supplement: s1 [file s1]

## Supplementary Table

**Table S1.** The results for the GSS-1 standard soil sample and a blank sample.

| Measurement batch | Element VIS | Mass | ISTD | CPS          | Conc.(mg/kg) | RSD(%) | Time(sec) | Rep |
|-------------------|-------------|------|------|--------------|--------------|--------|-----------|-----|
| GSS-1(a)          | Cr          | 53   | 103  | 0.1123062M   | 76.33        | 4.39   | 0.3       | 3   |
|                   | Ni          | 60   | 103  | 0.06333884P  | 21.24        | 4.85   | 0.3       | 3   |
|                   | Cu          | 63   | 103  | 0.1227121M   | 20.79        | 4.46   | 0.3       | 3   |
|                   | Zn          | 66   | ---  | 0.9860815A   | 447.4g       | 4.34   | 0.3       | 3   |
|                   | Ge          | 72   | 72   | 1086014A     | [1.000]      | ---    | 0.3       | 3   |
|                   | As          | 75   | ---  | 0.2941305P   | 28.99        | 6.62   | 0.3       | 3   |
|                   | Rh          | 103  | ---  | 6988909A     | [1.000]      | ---    | 0.3       | 3   |
|                   | Cd          | 111  | 103  | 0.006485183P | 3.142        | 3.13   | 0.3       | 3   |
|                   | In          | 115  | ---  | 8030326A     | [1.000]      | ---    | 0.3       | 3   |
|                   | Pb          | 208  | 115  | 1.234288A    | 72.23        | 4      | 0.3       | 3   |
| GSS-1(b)          | Cr          | 53   | 72   | 1.461278P    | 135.7        | 5.43   | 0.3       | 3   |
|                   | Ni          | 60   | 72   | 0.5278766P   | 21.56        | 5.28   | 0.3       | 3   |
|                   | Cu          | 63   | 72   | 1.245618P    | 22.59        | 5.63   | 0.3       | 3   |
|                   | Zn          | 66   | 72   | 5.335753P    | 337.6        | 3.85   | 0.3       | 3   |
|                   | Ge          | 72   | ---  | 142218.8P    | [1.000]      | ---    | 0.3       | 3   |
|                   | As          | 75   | 72   | 0.4808808P   | 38.87        | 4.8    | 0.3       | 3   |
|                   | Rh          | 103  | ---  | 849179.8P    | [1.000]      | ---    | 0.3       | 3   |
|                   | Cd          | 111  | 103  | 0.008941508P | 3.875        | 3.62   | 0.3       | 3   |
|                   | In          | 115  | ---  | 1190804A     | [1.000]      | ---    | 0.3       | 3   |
|                   | Pb          | 208  | 72   | 22.71698A    | 134          | 4.37   | 0.3       | 3   |
| GSS-1(c)          | Cr          | 53   | 72   | 1.443051P    | 140.7        | 0.8    | 0.3       | 3   |
|                   | Ni          | 60   | 72   | 0.5213098P   | 23.05        | 0.36   | 0.3       | 3   |
|                   | Cu          | 63   | 72   | 1.434594P    | 25.7         | 0.73   | 0.3       | 3   |
|                   | Zn          | 66   | 103  | 0.9743055P   | 557.8        | 2.01   | 0.3       | 3   |
|                   | Ge          | 72   | ---  | 143297.7P    | [1.000]      | ---    | 0.3       | 3   |
|                   | As          | 75   | 72   | 0.5110867P   | 42.83        | 1.18   | 0.3       | 3   |
|                   | Rh          | 103  | ---  | 861566.1P    | [1.000]      | ---    | 0.3       | 3   |
|                   | Cd          | 111  | 103  | 0.009860151P | 4.31         | 7.99   | 0.3       | 3   |
|                   | In          | 115  | ---  | 1208622A     | [1.000]      | ---    | 0.3       | 3   |
|                   | Pb          | 208  | 72   | 20.75197A    | 96.4         | 1.03   | 0.3       | 3   |
| GSS-1(d)          | Cr          | 53   | 72   | 1.395075P    | 149.5        | 1.66   | 0.3       | 3   |
|                   | Ni          | 60   | 72   | 0.3865449P   | 19.39        | 1.6    | 0.3       | 3   |
|                   | Cu          | 63   | 72   | 1.279008P    | 26.55        | 2.08   | 0.3       | 3   |
|                   | Zn          | 66   | 72   | 4.555682A    | 316.2        | 1.4    | 0.3       | 3   |
|                   | Ge          | 72   | ---  | 285468.3P    | [1.000]      | ---    | 0.3       | 3   |
|                   | As          | 75   | 72   | 0.3677151P   | 48.53        | 0.88   | 0.3       | 3   |
|                   | Rh          | 103  | ---  | 1689086A     | [1.000]      | ---    | 0.3       | 3   |
|                   | Cd          | 111  | 72   | 0.04488992P  | 3.05         | 2.42   | 0.3       | 3   |

|                   |    |     |     |              |            |      |     |   |
|-------------------|----|-----|-----|--------------|------------|------|-----|---|
| <b>GSS-1(e)</b>   | In | 115 | --- | 2141532A     | [1.000]    | ---  | 0.3 | 3 |
|                   | Pb | 208 | 72  | 15.07822A    | 144.2      | 0.84 | 0.3 | 3 |
|                   | Cr | 53  | 72  | 1.567618P    | 130.3      | 1.96 | 0.3 | 3 |
|                   | Ni | 60  | 72  | 0.4314035P   | 18.36      | 3.41 | 0.3 | 3 |
|                   | Cu | 63  | 72  | 1.44839P     | 25.08      | 2.48 | 0.3 | 3 |
|                   | Zn | 66  | 72  | 5.124125A    | 322.2      | 1.26 | 0.3 | 3 |
|                   | Ge | 72  | --- | 257222.9P    | [1.000]    | ---  | 0.3 | 3 |
|                   | As | 75  | 72  | 0.4227348P   | 37.34      | 1.19 | 0.3 | 3 |
|                   | Rh | 103 | --- | 1450864A     | [1.000]    | ---  | 0.3 | 3 |
|                   | Cd | 111 | 72  | 0.0483758P   | 2.914      | 2.81 | 0.3 | 3 |
| <b>GSS-1(f)</b>   | In | 115 | --- | 1201871A     | [1.000]    | ---  | 0.3 | 3 |
|                   | Pb | 208 | 72  | 17.36652A    | 99.89      | 3.21 | 0.3 | 3 |
|                   | Cr | 53  | 72  | 0.8907699P   | 117.3      | 3.35 | 0.3 | 3 |
|                   | Ni | 60  | 72  | 0.3515646P   | 20.9       | 2.88 | 0.3 | 3 |
|                   | Cu | 63  | 72  | 0.8941855P   | 20.42      | 3.7  | 0.3 | 3 |
|                   | Zn | 66  | 72  | 4.125449A    | 337.1      | 3.36 | 0.3 | 3 |
|                   | Ge | 72  | --- | 670699.8P    | [1.000]    | ---  | 0.3 | 3 |
|                   | As | 75  | 72  | 0.304971P    | 39.26      | 2.81 | 0.3 | 3 |
|                   | Rh | 103 | --- | 4134823A     | [1.000]    | ---  | 0.3 | 3 |
|                   | Cd | 111 | 103 | 0.005669929P | 3.623      | 2.69 | 0.3 | 3 |
| <b>Blank-1(a)</b> | In | 115 | --- | 5019341A     | [1.000]    | ---  | 0.3 | 3 |
|                   | Pb | 208 | 72  | 9.729826A    | 100        | 3.1  | 0.3 | 3 |
|                   | Cr | 53  | 72  | 0.8216197P   | 0.1138     | 1.59 | 0.3 | 3 |
|                   | Ni | 60  | 72  | 0.03163745P  | 0.001883   | 2.2  | 0.3 | 3 |
|                   | Cu | 63  | 72  | 0.3303213P   | 0.007334   | 1.76 | 0.3 | 3 |
|                   | Zn | 66  | 103 | 0.01713481P  | 0.01253    | 2.65 | 0.3 | 3 |
|                   | Ge | 72  | --- | 204125.7P    | [1.000]    | ---  | 0.3 | 3 |
|                   | As | 75  | 72  | 0.2058558P   | 0.02428    | 1.34 | 0.3 | 3 |
|                   | Rh | 103 | --- | 1860969A     | [1.000]    | ---  | 0.3 | 3 |
|                   | Cd | 111 | 103 | 3.256904E-4P | 0.00007019 | 1.2  | 0.3 | 3 |
| <b>Blank-1(b)</b> | In | 115 | --- | 2252042A     | [1.000]    | ---  | 0.3 | 3 |
|                   | Pb | 208 | 72  | 0.2876512P   | 0.002933   | 4.39 | 0.3 | 3 |
|                   | Cr | 53  | 72  | 0.8216197P   | 0.1155     | 1.62 | 0.3 | 3 |
|                   | Ni | 60  | 72  | 0.03163745P  | 0.001742   | 2.37 | 0.3 | 3 |
|                   | Cu | 63  | 72  | 0.3303213P   | 0.00744    | 1.94 | 0.3 | 3 |
|                   | Zn | 66  | 72  | 0.1561875P   | 0.01145    | 2.53 | 0.3 | 3 |
|                   | Ge | 72  | --- | 204125.7P    | [1.000]    | ---  | 0.3 | 3 |
|                   | As | 75  | 72  | 0.2058558P   | 0.02519    | 1.34 | 0.3 | 3 |
|                   | Rh | 103 | --- | 1860969A     | [1.000]    | ---  | 0.3 | 3 |
|                   | Cd | 111 | 103 | 3.256904E-4P | 0.0001028  | 1.03 | 0.3 | 3 |
| <b>Blank-1(c)</b> | In | 115 | --- | 2252042A     | [1.000]    | ---  | 0.3 | 3 |
|                   | Pb | 208 | 72  | 0.2876512P   | 0.004138   | 4.25 | 0.3 | 3 |
|                   | Cr | 53  | 72  | 0.7443076P   | 0.09796    | 5.85 | 0.3 | 3 |
|                   | Ni | 60  | 72  | 0.02055587P  | 0.001269   | 4.56 | 0.3 | 3 |

|            |    |     |     |              |            |      |     |   |
|------------|----|-----|-----|--------------|------------|------|-----|---|
| Blank-1(d) | Cu | 63  | 72  | 0.3841288P   | 0.008827   | 0.79 | 0.3 | 3 |
|            | Zn | 66  | 72  | 0.1084283P   | 0.009099   | 5.52 | 0.3 | 3 |
|            | Ge | 72  | --- | 546400.8P    | [1.000]    | ---  | 0.3 | 3 |
|            | As | 75  | 72  | 0.1470554P   | 0.02034    | 6.47 | 0.3 | 3 |
|            | Rh | 103 | --- | 3882557A     | [1.000]    | ---  | 0.3 | 3 |
|            | Cd | 111 | 72  | 0.002934154P | 0.0003153  | 8.75 | 0.3 | 3 |
|            | In | 115 | --- | 4497101A     | [1.000]    | ---  | 0.3 | 3 |
|            | Pb | 208 | 72  | 0.1570679P   | 0.002927   | 2.01 | 0.3 | 3 |
|            | Cr | 53  | 72  | 0.3858697P   | 0.05115    | 5.32 | 0.3 | 3 |
|            | Ni | 60  | 72  | 0.01691905P  | 0.001024   | 3.65 | 0.3 | 3 |
|            | Cu | 63  | 72  | 1.390290P    | 0.03787    | 3.42 | 0.3 | 3 |
|            | Zn | 66  | 72  | 0.1702965P   | 0.01526    | 3.81 | 0.3 | 3 |
|            | Ge | 72  | --- | 541436.2P    | [1.000]    | ---  | 0.3 | 3 |
|            | As | 75  | 72  | 0.08443311P  | 0.01158    | 4.77 | 0.3 | 3 |
|            | Rh | 103 | --- | 4119793A     | [1.000]    | ---  | 0.3 | 3 |
| Blank-1(e) | Cd | 111 | 72  | 9.985797E-4P | 0.0001329  | 1.66 | 0.3 | 3 |
|            | In | 115 | --- | 4730208A     | [1.000]    | ---  | 0.3 | 3 |
|            | Pb | 208 | 72  | 0.07445747P  | 0.002185   | 1.2  | 0.3 | 3 |
|            | Cr | 53  | 72  | 0.4623221P   | 0.0689     | 4.67 | 0.3 | 3 |
|            | Ni | 60  | 72  | 0.08591155P  | 0.00593    | 5.77 | 0.3 | 3 |
|            | Cu | 63  | 72  | 0.1742320P   | 0.004016   | 1.77 | 0.3 | 3 |
|            | Zn | 66  | 72  | 0.1441002P   | 0.01248    | 4.28 | 0.3 | 3 |
|            | Ge | 72  | --- | 202087.6P    | [1.000]    | ---  | 0.3 | 3 |
|            | As | 75  | 72  | 0.09747890P  | 0.0179     | 5.14 | 0.3 | 3 |
|            | Rh | 103 | --- | 1725410A     | [1.000]    | ---  | 0.3 | 3 |
|            | Cd | 111 | 72  | 6.36600E-4P  | 0.00005514 | 1.01 | 0.3 | 3 |
|            | In | 115 | --- | 2187218A     | [1.000]    | ---  | 0.3 | 3 |
|            | Pb | 208 | 72  | 0.1168152P   | 0.001861   | 2.61 | 0.3 | 3 |
|            | Cr | 53  | 103 | 0.03282658P  | 0.03506    | 1.16 | 0.3 | 3 |
|            | Ni | 60  | 103 | 0.002728192P | 0.001337   | 1.49 | 0.3 | 3 |
| Blank-1(f) | Cu | 63  | 103 | 0.01515849P  | 0.001197   | 1.71 | 0.3 | 3 |
|            | Zn | 66  | 103 | 0.01313438P  | 0.007839   | 0.56 | 0.3 | 3 |
|            | Ge | 72  | --- | 464003.8P    | [1.000]    | ---  | 0.3 | 3 |
|            | As | 75  | 103 | 0.009878991P | 0.01081    | 2.55 | 0.3 | 3 |
|            | Rh | 103 | --- | 3577919A     | [1.000]    | ---  | 0.3 | 3 |
|            | Cd | 111 | 103 | 7.76226E-05  | 0.0006056  | 0.81 | 0.3 | 3 |
|            | In | 115 | --- | 4250361A     | [1.000]    | ---  | 0.3 | 3 |
|            | Pb | 208 | 103 | 0.01166926P  | 0.001204   | 1.66 | 0.3 | 3 |

**Table S2.** Vegetation indices derived from Landsat 8 OLI image.

| Vegetation index | Calculation formula                      | Reference |
|------------------|------------------------------------------|-----------|
| CI               | $b6/b7$                                  | [28]      |
| CAI              | $b4/b3$                                  | [29]      |
| SAVI             | $(b5-b4)(1+L)/(b5+b4+L)$ , where $L=0.5$ | [30]      |
| NDVI             | $(b5-b4)/(b5+b4)$                        | [31]      |

**Table S3** Studies on farming practices for soil heavy metals.

| Study area                                                                                     | Heavy metals                          | Data acquisition                                                                                                                 | The influence of farming practices                                                                                                                                                                                                                                                                                                            | Reference |
|------------------------------------------------------------------------------------------------|---------------------------------------|----------------------------------------------------------------------------------------------------------------------------------|-----------------------------------------------------------------------------------------------------------------------------------------------------------------------------------------------------------------------------------------------------------------------------------------------------------------------------------------------|-----------|
| Ghaziabad, India                                                                               | Ni, Cu, Cr, Pb, Cd, Zn, Fe and Mn     | Two different soil sites were selected: wastewater irrigated soil, and ground water irrigated soil                               | Irrigation of soils with wastewater contributes to the deposition of toxic metals in agriculturally important and other crops, which eventually causes toxicity to humans and grazing animals via food chain.                                                                                                                                 | [85]      |
| Hunan province, China                                                                          | Pb, Cd, Cr, As, Hg and Cu             | Pot experiment: five silicon fertilizer treatments                                                                               | The regulation of soil pH, EC and available-K were part of the approaches for silicon fertilizer to promote growth of pakchoi vegetable under the pressure of heavy metals and had a significant influence on bacterial community structure.                                                                                                  | [86]      |
| A farm from Al Shati province which is located in the southern west part of Libya              | Cr, Cu, Cd, Mn, Zn, Ni, Fe and Pb     | A total of six samples were collected each from urea and diammonium phosphate fertilizers and four samples from irrigation water | Chemical fertilizers such as NPK which are added as a source of nitrogen, phosphorous and potassium may contain some HMs (Cd, As, Cr, Ni, and Pb) as impurities. Application of excessive amounts of chemical fertilizers and poultry manures can also increase levels of HMs such as Cd, Cu, Zn and Pb in soils and subsequently in plants.  | [87]      |
| A farmland in Dongfang City, Hainan Province, China                                            | Cd, Cr and Pb                         | Pot incubation experiments and field plot experiment: seaweed organic fertilizer                                                 | In the field experiment, combined amendments (seaweed organic fertilizer-apatite-biochar) improved soil quality, enhanced nutrient concentrations, reduced soil Cd and Cr bioavailability, reduced plant Cd, Pb, and Cr uptake, and enhanced maize production.                                                                                | [88]      |
| A 36 m <sup>2</sup> piece of agricultural land near Kermanshah's wastewater treatment facility | Fe, Mn, Cu, Zn, As, Pb, Cd, Ni and Cr | Three kinds of irrigation sources                                                                                                | Overuse of fertilizers can increase metals like Cd, Pb, and Zn in the soil, and agricultural products are grown. Since various industrial wastewater in treated and untreated (containing high levels of As and Pb) were used to irrigate the cultivation site, the metals mentioned can be transferred to the soil and contaminate the soil. | [89]      |
