# Supplementary figures and images for: Source Apportionment of Soil Heavy Metal(Loid)s in Farmland Using Diverse Models: A Comparative Assessment in the Yellow River Delta
Source: MDPI journal article supplement (doi:10.3390/jmse11051069), 2023-05-17

## Supplementary Figure

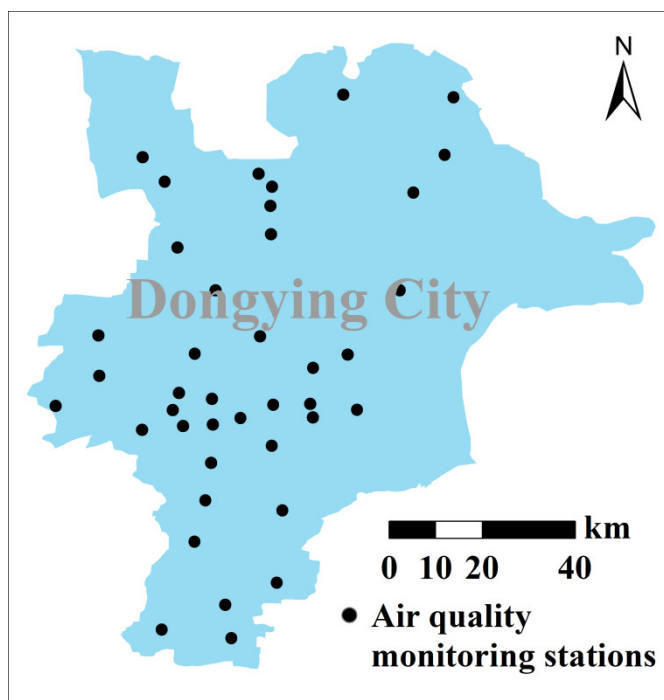

**Figure S1.** 40 air quality monitoring stations in the Dongying city.

Supplement: s1 [file s1]
